# Supplementary material for: Fast and simplified synthesis of cuprous oxide nanoparticles: annealing studies and photocatalytic activity
Source: Royal Society of Chemistry journal article supplement (doi:10.1039/c4ra12406e), 2014-01-01
Supplement: c4ra12406e1.pdf [file c4ra12406e1.pdf]

## Supporting Information

### **A fast and simplified synthesis of cuprous oxide nanoparticles: anneal studies and photocatalytic activity**

Liangbin Xiong,<sup>\*ab</sup> Huaqing Xiao,<sup>a</sup> Shunsheng Chen,<sup>c</sup> Zhihong Chen,<sup>a</sup> Xunong Yi,<sup>a</sup> Sheng Wen,<sup>d</sup> Genwen Zheng,<sup>d</sup> Yaoming

Ding<sup>a</sup> and Huaqing Yu<sup>a\*</sup>

*<sup>a</sup>School of Physics and electronic-information Engineering, Hubei Engineering University, Xiaogan, 432000, China.*

*<sup>b</sup>Key Laboratory of Artificial Micro- and Nano-structures of Ministry of Education of China, School of Physics & Technology, Wuhan University, Wuhan, Hubei 430072, P. R. China.*

*<sup>c</sup>The Institute for Quantum materials and School of Mathematics and Physics Hubei Polytechnic University, Huangshi, P. R. China, 435003, China.*

*<sup>d</sup>College of Chemistry and Materials Science, Hubei Engineering University, Xiaogan 432000, China*

---

\*Corresponding authors: Tel: +86 712 2345 441, E-mail: [Xiong\\_lb@yahoo.com](mailto:Xiong_lb@yahoo.com) (L. B. Xiong); and Tel: +86 712 2345 441, E-mail: [yuhuaqing@126.com](mailto:yuhuaqing@126.com) (H. Q. Yu)

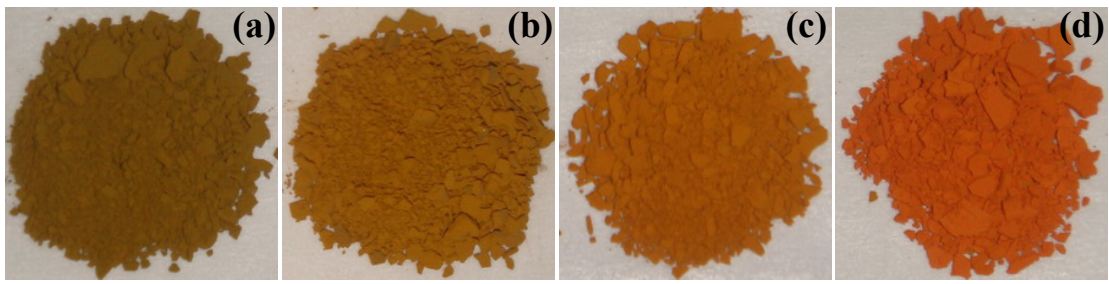

Figure S1 The photographs of  $\text{Cu}_2\text{O}$  NPs annealed at (a) 200, (b) 300, (c) 400, and (d) 500°C under  $\text{N}_2$  atmosphere for 2h.

Table S1 The peak height/area, peak height/area ratio of planes (111) and (200) for samples 1-5, respectively.

| Samples          | 1           | 2           | 3           | 4            | 5             |
|------------------|-------------|-------------|-------------|--------------|---------------|
| PH/A* (111)      | 186.1/285.2 | 188.2/286.1 | 594.2/577.7 | 1868.2/751.7 | 2519.4/982.16 |
| PH/A ratio (111) | 0.65        | 0.66        | 1.03        | 2.49         | 2.56          |
| PH/A (200)       | 67.5/110.8  | 67.5/111.6  | 163.3/216.9 | 560.0/298.0  | 682.9/388.5   |
| PH/A ratio (200) | 0.61        | 0.61        | 0.75        | 1.87         | 1.75          |

\* PH/A= peak height/area

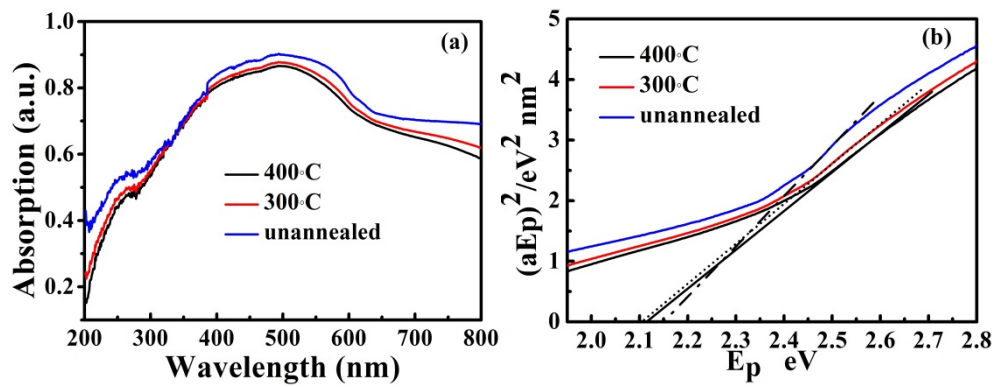

Figure S2 (a) The UV-vis diffuse reflectance spectra for unannealed Cu<sub>2</sub>O NPs, and Cu<sub>2</sub>O NPs annealed at 300 and 400 °C, and (b) their corresponding  $(\alpha E_p)^2$  vs  $E_p$  curves, respectively.

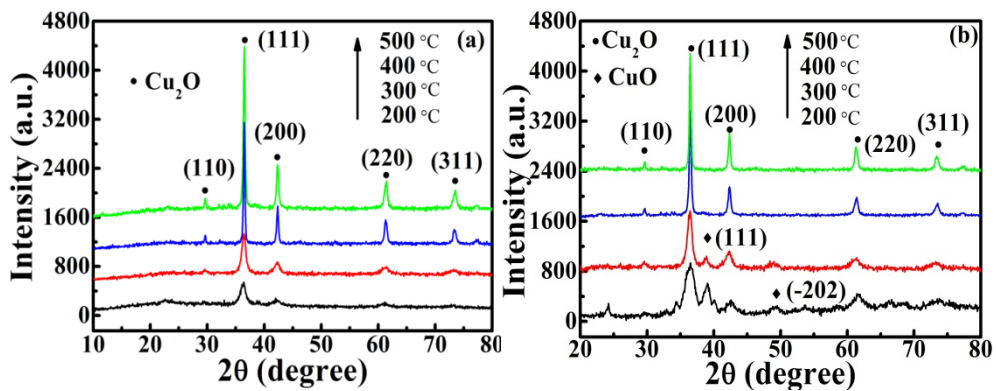

Figure S3 XRD patterns of samples 2-5 (a) before and (b) after PC experiments.
